# Supplementary material
Source: PubMed Central journal article supplement (PMC7354848)
Supplement: NIHMS1601115-supplement-Supplemental_data.pdf [file NIHMS1601115-supplement-Supplemental_data.pdf]

1

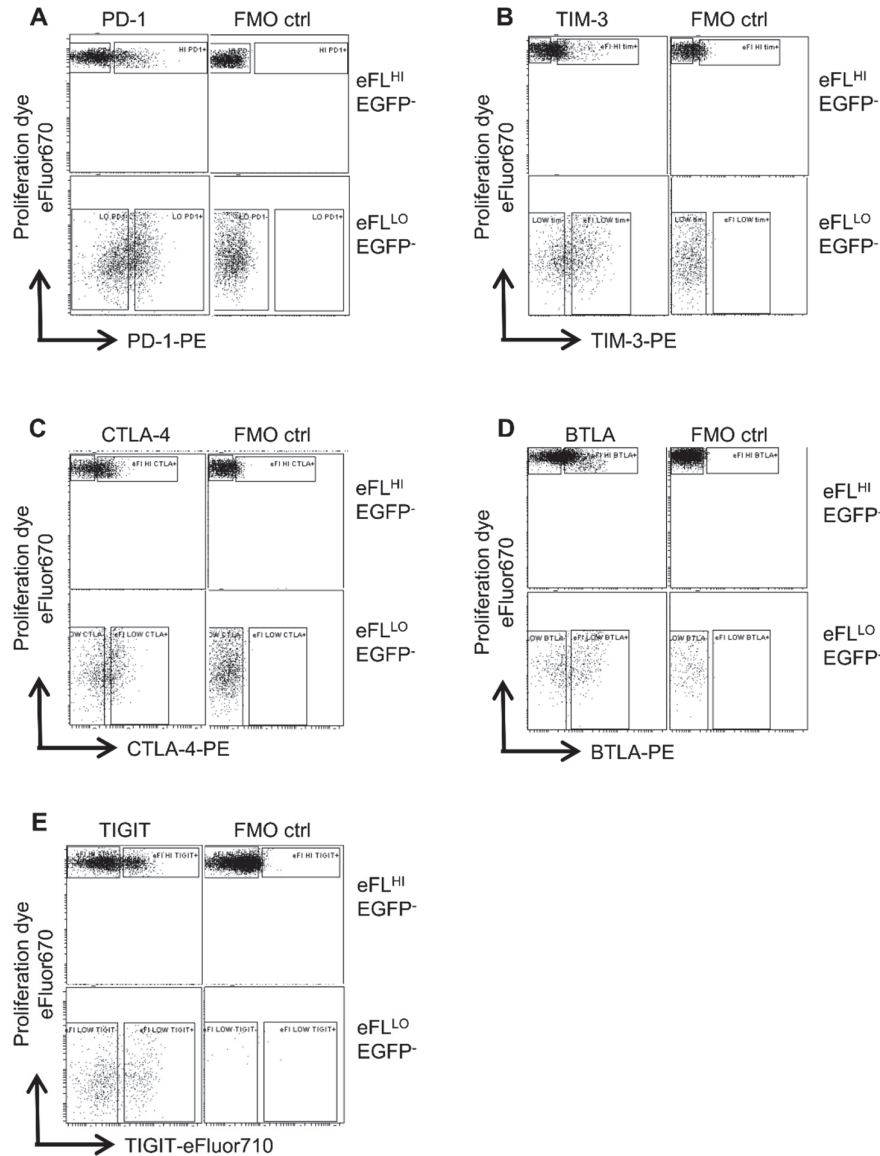

2

3

4

5

6

7

8

9

10

11

12

13

**Figure S1. Sorting strategy to select for cells expressing high and low levels of IC molecules in non-proliferating and proliferating CD4<sup>+</sup> T cells.** Resting CD4<sup>+</sup> T cells were cultured with syngeneic monocytes in the presence of SEB and infected with EGFP-reporter virus. At day 5 post-infection CD3<sup>+</sup>HLA-DR<sup>-</sup>EGFP<sup>-</sup> (not productively infected), eFluor670<sup>HI</sup> (non-proliferating) and eFluor670<sup>LO</sup> (proliferating) T cells were further sorted based on IC molecule expression into low/negative (-) and high (+) expressing populations compared to FMO controls. Representative dot-plots of gating strategies for EGFP<sup>-</sup> eFluor670 high and low cells that express **A**: PD-1, **B**: TIM-3, **C**: CTLA-4, **D**: BTLA and **E**: TIGIT.

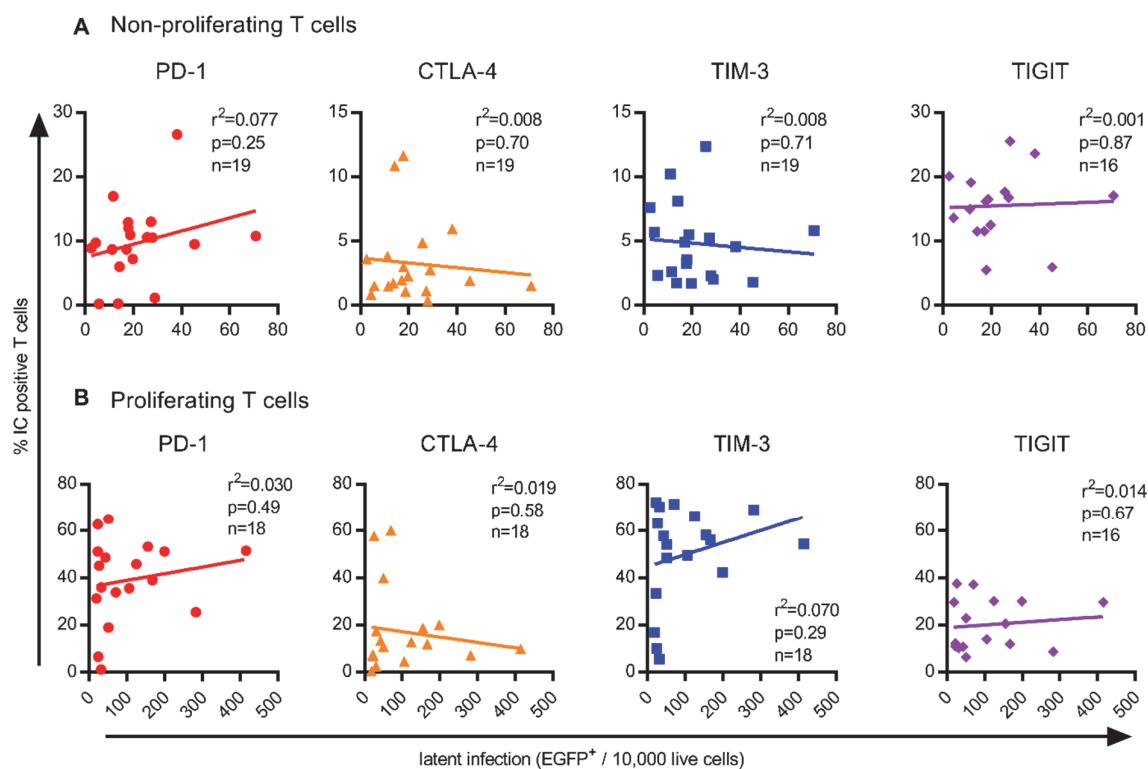

14

15

16

17

18

19

20

21

22

23

24

25

26

27

**Figure S2. No correlation between IC expression and the level of latent infection in non-proliferating and proliferating T cells.** Resting CD4<sup>+</sup> T cells were co-cultured with syngeneic monocytes in the presence of SEB and infected with EGFP-reporter HIV. At day 5 post-infection CD3<sup>+</sup>HLA-DR<sup>-</sup>EGFP<sup>-</sup> non-proliferating (A) and proliferating (B) T cells were sorted and cultured in the presence of an integrase inhibitor with and without anti-CD3/CD28+IL-7+IL-2. On day 8, EGFP<sup>+</sup> cells were measured by flow cytometry and latent infection was calculated by subtracting the number of EGFP<sup>+</sup> cells in the unstimulated culture from the number of EGFP<sup>+</sup> cells in the stimulated culture. From the day 5 samples, an aliquot was taken prior to the sort and the CD3<sup>+</sup>HLA-DR<sup>-</sup>EGFP<sup>-</sup> non-proliferating (A) and proliferating (B) T cells and were analyzed for PD-1 (red circles), CTLA-4 (orange triangles), TIM-3 (blue squares) or TIGIT (purple diamonds) expression by flow cytometry. Symbols represent individual donors. Correlation was determined using linear regression.

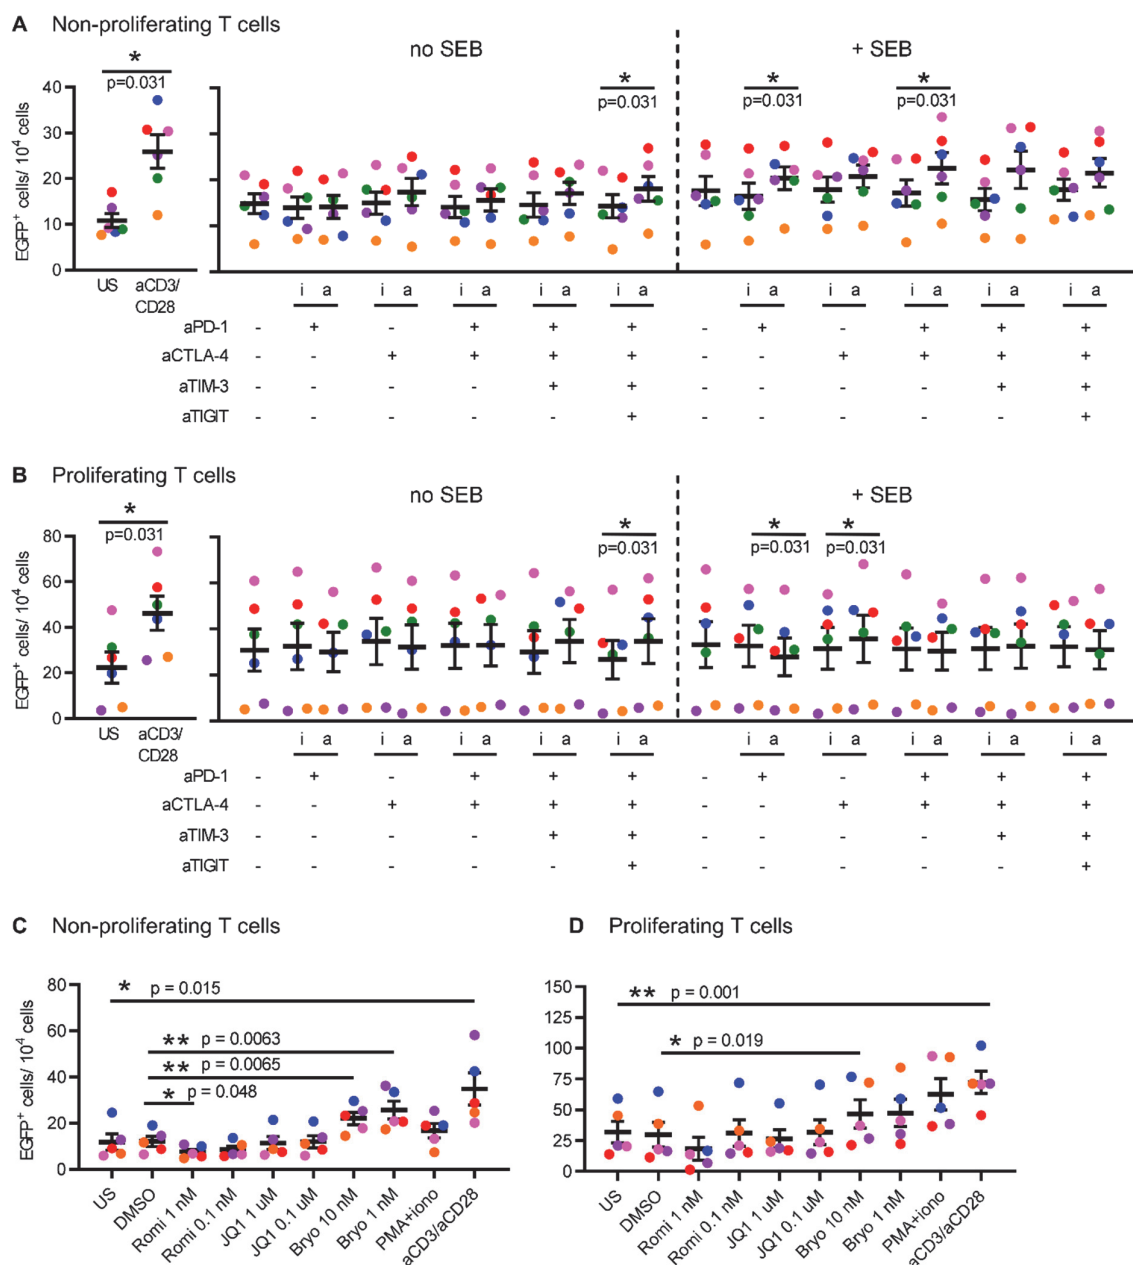

28  
29  
30  
31  
32  
33  
34  
35  
36  
37  
38  
39  
40  
41  
42

**Figure S3. PD-1 blockade can reverse latent HIV but only in the presence of SEB or other IC blockers.** To determine the effects of IC blockers (**A, B**) and different LRAs (**C, D**) on latency reversal in vitro, resting CD4<sup>+</sup> T cells were co-cultured with syngeneic monocytes in the presence of SEB and infected with EGFP-reporter HIV. At day 5 post-infection CD3<sup>+</sup>HLA-DR<sup>-</sup> EGFP<sup>-</sup> non-proliferating (**A, C**) and proliferating (**B, D**) T cells were sorted. Sorted cells were cultured in the presence of integrase inhibitor with and without anti-CD3/CD28+IL-7+IL-2 or with an isotype (i) control or IC antibody (a) (**A, B**), or sorted cells were cultured with a panel of different LRAs (**C, D**). On day 8, EGFP<sup>+</sup> cells were measured by flow cytometry and latent infection was calculated by subtracting the number of EGFP<sup>+</sup> cells in the unstimulated culture from the number of EGFP<sup>+</sup> cells in the stimulated culture. Black lines indicate mean values ±SEM and equal colours represent equal donors across panels A-B (n=6) or C-D (n=5). \*p<0.05, \*\*p<0.01 as determined by Student's T test (n≤5) or Wilcoxon matched pairs signed rank test (n>5). US = unstimulated, aCD3/CD28 = anti-CD3/CD28+IL-7+IL-2 treated, i = isotype control, a = IC blocking antibody, Romi = romidepsin, Bryo = bryostatin.
